# Supplementary material for: Bioactive Ent-Kaurane Diterpenes Oridonin and Irudonin Prevent Cancer Cells Migration by Interacting with the Actin Cytoskeleton Controller Ezrin
Source: MDPI journal article supplement (doi:10.3390/ijms21197186), 2020-09-29
Supplement: s1 [file s1]

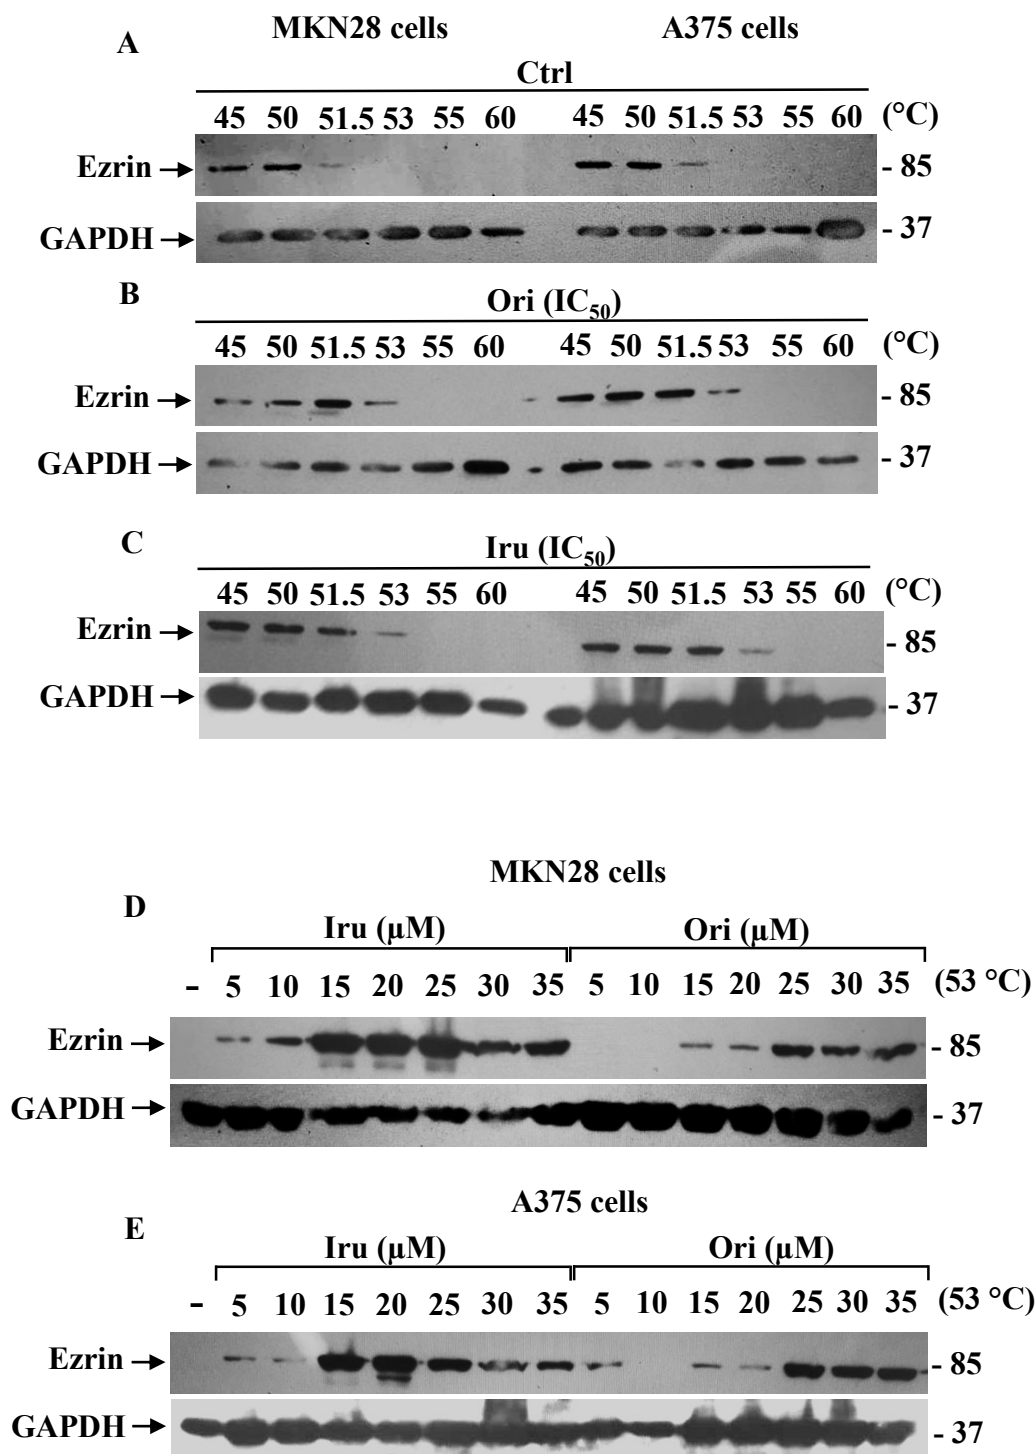

**Figure S5:** Representative images of CETSA Western blotting, showing Ezrin protein levels in A375 and MKN28 cells. The Ezrin T<sub>m</sub> was evaluated in untreated cells (A), or following a 2 h exposure to a concentration of Ori (B) or Iru (C) corresponding to the respective IC<sub>50</sub>. EC<sub>50</sub> of each compound was estimated by performing CETSA experiments after incubation with different amounts of or Iru of MKN28 (D) or A375 (E) cells.
