# Supplementary material for: Bioactive Ent-Kaurane Diterpenes Oridonin and Irudonin Prevent Cancer Cells Migration by Interacting with the Actin Cytoskeleton Controller Ezrin
Source: MDPI journal article supplement (doi:10.3390/ijms21197186), 2020-09-29
Supplement: s1 [file s1]

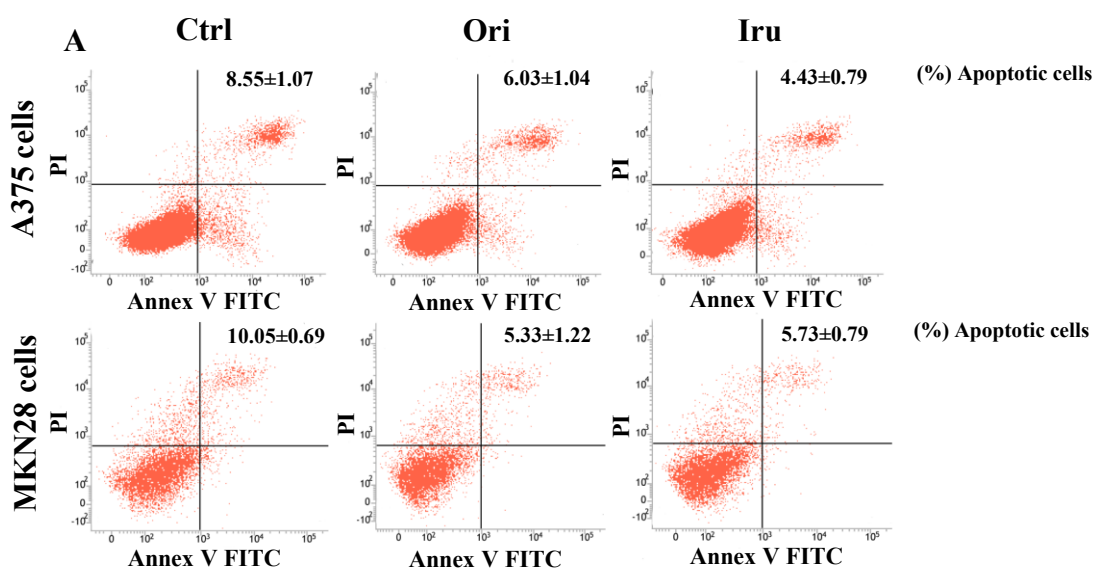

**Figure S3** Apoptotic effect of Ori or Iru in **(A)** A375 and MKN28 cells. Cells were incubated for 24 h with 10  $\mu$ M Ori or Iru. Annexin V–FITC binding and the propidium iodide incorporation were evaluated cytofluorimetrically. The rates of apoptosis were quantified (top right quadrant). The data are expressed as a percentage of apoptotic cells adding the percentual of Annexin V-positive/PI-negative cells (early apoptotic cells), and Annexin V-positive/PI-positive (late apoptotic cells). Data are shown from one of three independent experiments.
