# Supplementary material for: Bioactive Ent-Kaurane Diterpenes Oridonin and Irudonin Prevent Cancer Cells Migration by Interacting with the Actin Cytoskeleton Controller Ezrin
Source: MDPI journal article supplement (doi:10.3390/ijms21197186), 2020-09-29
Supplement: s1 [file s1]

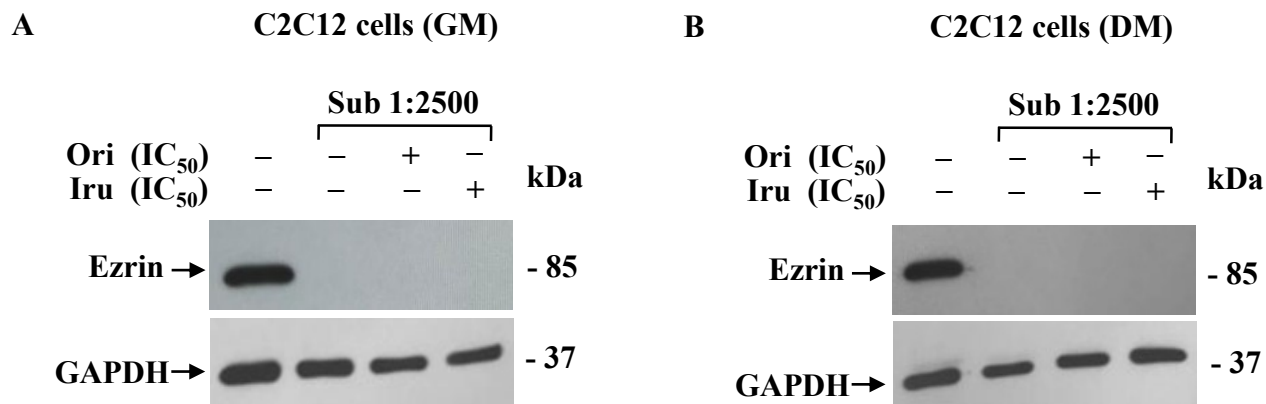

**Figure S4:** Western blotting showing Ezrin protein levels in (A) C2C12 undifferentiated cells (cultured in GM) and (B) C2C12 differentiated cells (cultured in DM) treated with IC<sub>50</sub> values of Ori or Iru for 2h. After treatments, cells were lysated and the protein extracts were subjected to a limited digestion with subtilisin (1:2500). The resulting partially hydrolyzed protein mixtures were used for Western blotting analysis of DARTS experiments. GAPDH was used as a control protein as it partially resists to subtilisin catalyzed proteolysis.
